# Supplementary material
Source: PubMed Central journal article supplement (PMC6018367)
Supplement: JB.00727-17_zjb999094730s1.pdf [file JB.00727-17_zjb999094730s1.pdf]

|       |              |              |        |                                                             |     |
|-------|--------------|--------------|--------|-------------------------------------------------------------|-----|
| A     | RsaM1        | Q2T542_BURTA | 1      | -----MNSPLLHRFRGPSTDGYVRLPVHAFELQL                          | 30  |
|       | RsaM2        | Q2T5X5_BURTA | 1      | -----MAQ--RSAPASSAPAAAGQDGYVRLSLPQLARVSL                    | 33  |
|       | RsaM         | D3UT96_9PSED | 1      | MSEDARDSPDSNALEFGYQTCGGIYLKRONQSSRAIHMOSLAPDQLVRLSYPELIDLSE | 60  |
|       |              |              |        |                                                             |     |
| RsaM1 | Q2T542_BURTA | 31           | VHVS   | SGIDSGLLGELRASDIDARVAGYTEWERPSSTGAAHLTVGWDWYIDGATGAFVIAW    | 90  |
| RsaM2 | Q2T5X5_BURTA | 34           | APTFAA | ADDQILSEIINDLGICALRAGYCEWSDAHW--PAPTSLGWSNFVDVE-KTLRTVP     | 90  |
| RsaM  | D3UT96_9PSED | 61           | OPYLAW | IDTSLTAEIKFGLPVAYAGYSENECQDS--APKLSISWVWFKEAFSGKVLTA        | 118 |
|       |              |              |        |                                                             |     |
| RsaM1 | Q2T542_BURTA | 91           | GDVRS  | NLMGIDGNGLDIGMDPTSAALSRRLAQLNWPSAVATAMLRGDFSHAGPTLQ         | 147 |
| RsaM2 | Q2T5X5_BURTA | 91           | DSLAS  | NLMIIISAEGYDLGPENTRRFLLDWIAKFDWRGLLAP-LIQD-----             | 135 |
| RsaM  | D3UT96_9PSED | 119          | GGIS   | CNIMLRSRPGYDLGPDMTQQLLVWISRQGLECKLPAGLMDRES-----            | 167 |

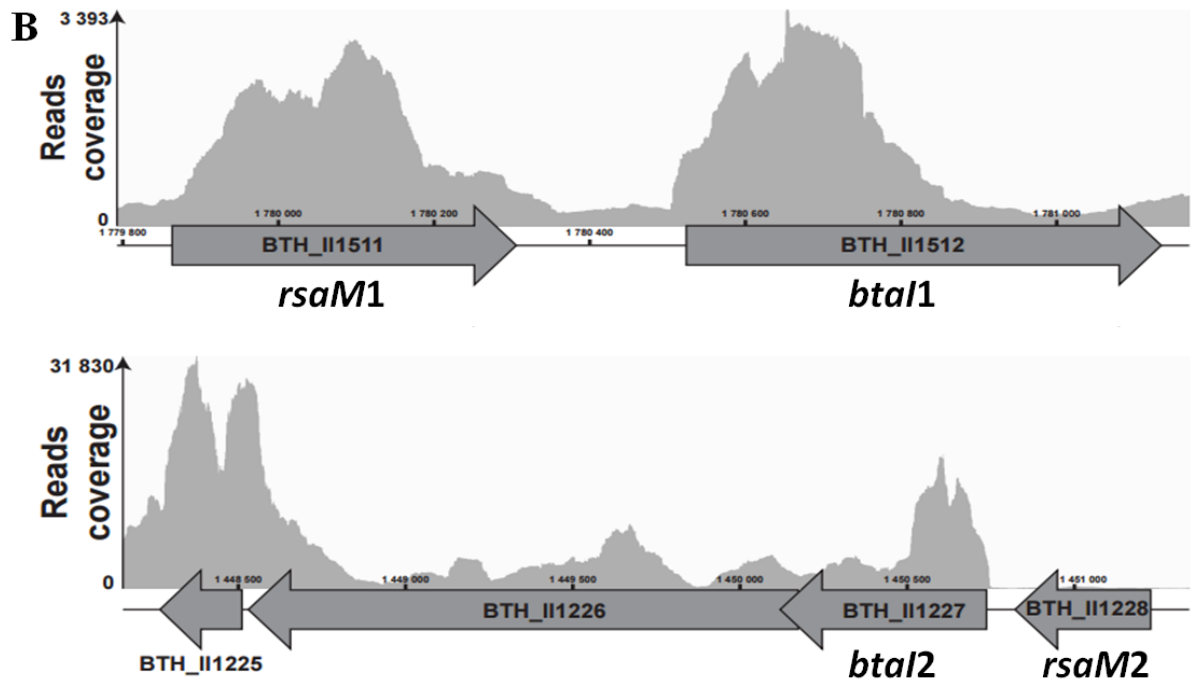

**C**

|                                   |                            |                       |
|-----------------------------------|----------------------------|-----------------------|
| <i>Vibrio fischeri</i>            | <i>luxI</i> (-32 to -13)   | ACCTGTACGATCGTACAGGT  |
| <i>Pseudomonas aeruginosa</i>     | <i>rhII</i> (-155 to -136) | CCCTACCAAGATCTGCAGGT  |
| <i>Burkholderia thailandensis</i> | <i>rsaM</i> (-54 to -35)   | CGCTGTACATACTTGCTAGGT |
| <i>Burkholderia pseudomallei</i>  | <i>bpsI</i> (-80 to -61)   | CCCTGTAACGGTTACACTT   |
| <i>Burkholderia cenocepacia</i>   | <i>cepI</i> (-82 to -63)   | CCCTGTAACAGTTACACTT   |

**Figure S1. *B. thailandensis* possesses two conserved RsaM-like proteins designated RsaM1 and RsaM2.** (A) Sequence alignment of the RsaM1 and RsaM2 proteins of *B. thailandensis* E264 with the *P. fuscovaginae* UPB0736 RsaM homologue. The alignment was generated using Clustal W. Strictly conserved residues are shown on a dark grey background and moderately conserved ones are shown on a light grey background. (B) Genetic arrangement of the RsaM1- and RsaM2-encoding genes with *btaI1* and *btaI2*, respectively. (C) The *rsaM1* gene that codes for RsaM1 possesses in its promoter region a putative *lux* box sequence, which is homologous to characterized *lux* box sequences in Proteobacteria. The start and stop positions of each sequence are indicated in parentheses relative to the translational start site.

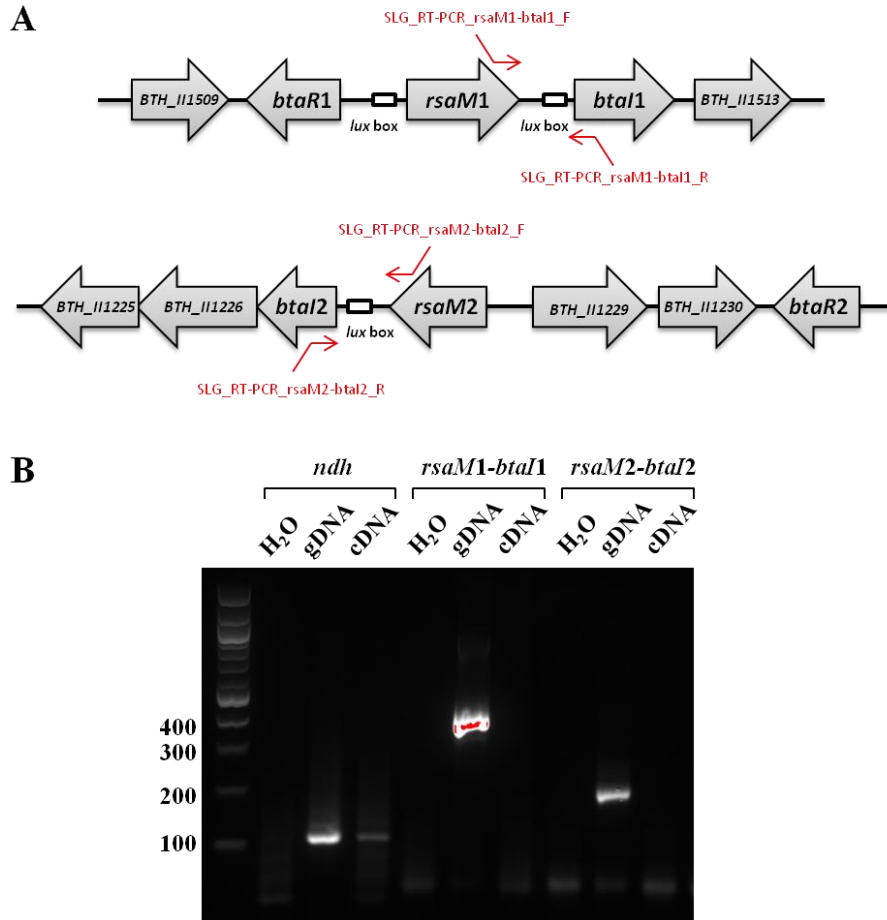

**Figure S2. Confirmation of the genetic organization of the *rsaM1* and *rsaM2* genes.** (A) The *rsaM1* and *rsaM2* genes are directly adjacent to *btaI1* and *btaI2* on the genome of *B. thailandensis* E264, respectively. The SLG\_RT-PCR\_ *rsaM1-btaI1\_F* and SLG\_RT-PCR\_ *rsaM1-btaI1\_R* primer pair was used to amplify the intergenic region of the *rsaM1* and *btaI1* genes, whereas the SLG\_RT-PCR\_ *rsaM2-btaI2\_F* and SLG\_RT-PCR\_ *rsaM2-btaI2\_R* primer pair was used to amplify the intergenic region of the *rsaM2* and *btaI2* genes. These regions each contain a putative *lux* box sequence as reported previously (1). (B) RT-PCR experiments were performed to examine cotranscription of the *rsaM1* and *rsaM2* genes with *btaI1* and *btaI2*, respectively, and analyzed by agarose gel electrophoresis. The notation *ndh* indicates that the PCR reactions were conducted using the SLG\_qRT-PCR\_ *ndh\_F* and SLG\_qRT-PCR\_ *ndh\_R* primer pair with H<sub>2</sub>O as a negative control, genomic DNA (gDNA) as a positive control, or complementary DNA (cDNA) of *B. thailandensis* E264. These reactions testify to the efficiency of the RT-PCR experiments as revealed by the presence of a PCR amplification product in the cDNA lane. The notation *rsaM1-btaI1* indicates that the PCR reactions were carried out with the SLG\_RT-PCR\_ *rsaM1-btaI1\_F* and SLG\_RT-PCR\_ *rsaM1-btaI1\_R* primer pair, whereas the notation *rsaM2-btaI2* indicates that the PCR reactions were carried out with the SLG\_RT-PCR\_ *rsaM2-btaI2\_F* and SLG\_RT-PCR\_ *rsaM2-btaI2\_R* primer pair. The absence of PCR amplification products in the cDNA lanes reveals that neither *rsaM1* nor *rsaM2* are cotranscribed with the *btaI1* and *btaI2* genes, respectively. The molecular marker is the DNA Ladder 100 bp (New England Biolabs, Inc., Whitby, ON, Canada).

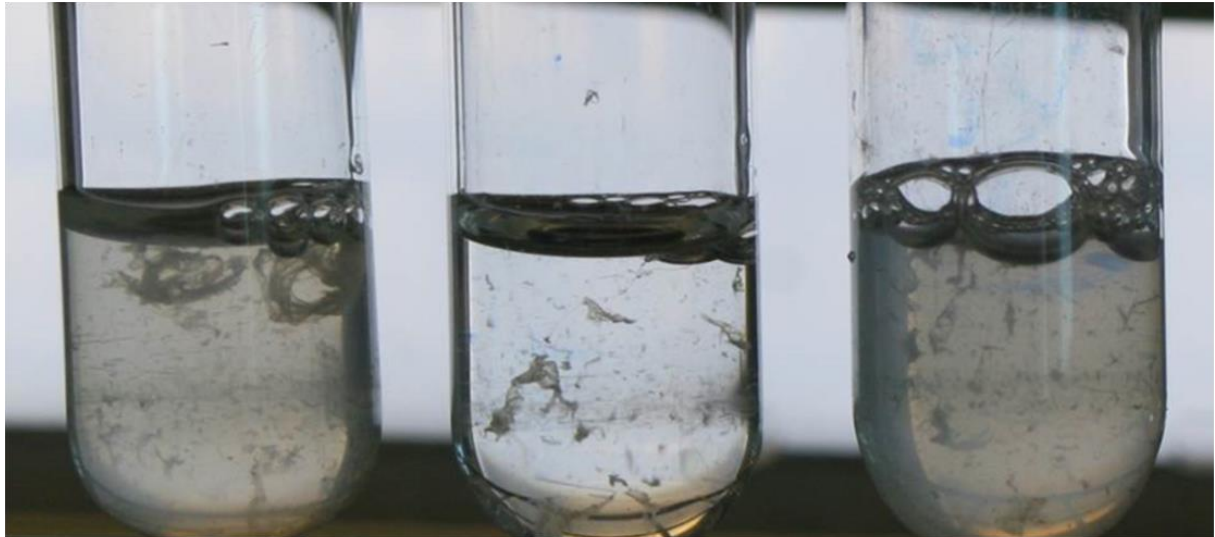

**Wild-type**

***rsaM1*-**

***rsaM2*-**

**Figure S3. Cell aggregation in the wild-type and the *rsaM1*- and *rsaM2*- mutant strains of *B. thailandensis* E264.** To assess auto-aggregation of the *B. thailandensis* E264 wild-type strain and *rsaM1*- and *rsaM2*- mutant strains, overnight bacterial cultures were diluted in M9 minimal medium supplemented with 0.4% glucose (wt/vol) and morpholinepropanesulfonic acid (MOPS) buffer (50 mM; pH 7.0) to an initial OD<sub>600</sub> of 0.01 and grown with shaking for 24 hrs at 37°C as described previously (2).

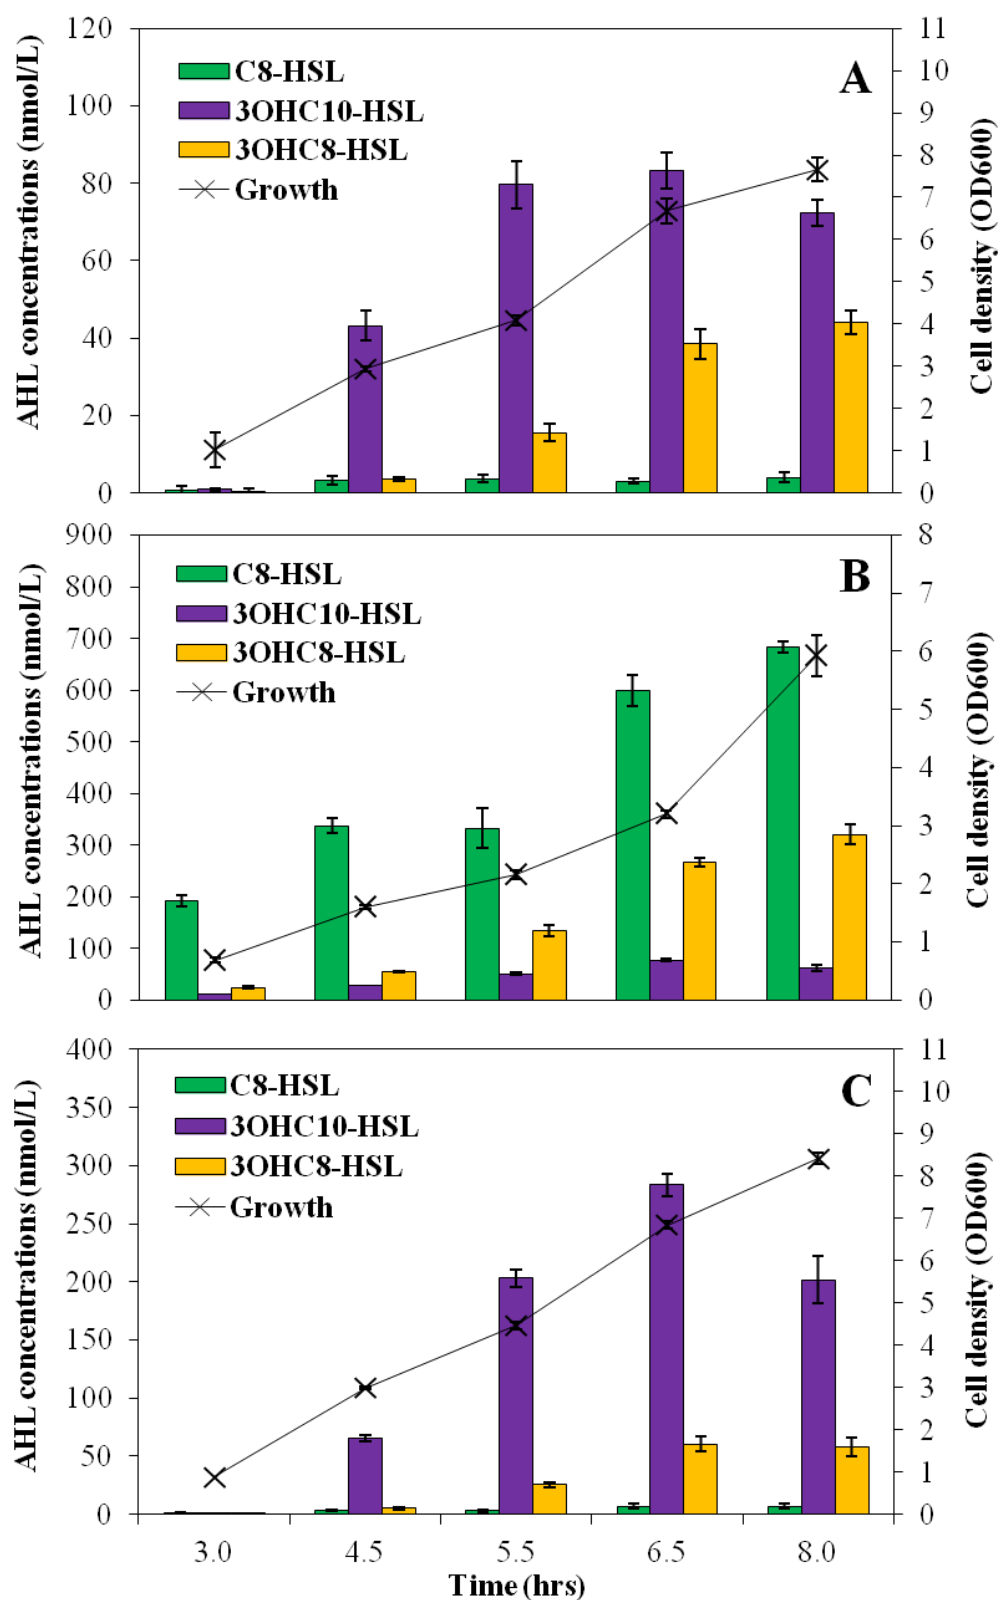

**Figure S4. AHL production profiles in the wild-type and the *rsaM1*- and *rsaM2*- mutant strains of *B. thailandensis* E264.** The biosynthesis of AHLs (bars) was monitored by LC-MS/MS at various times during growth (lines) in cultures of (A) the *B. thailandensis* E264 wild-type strain and (B) *rsaM1*- and (C) *rsaM2*- mutant strains. The values represent the means for three replicates.

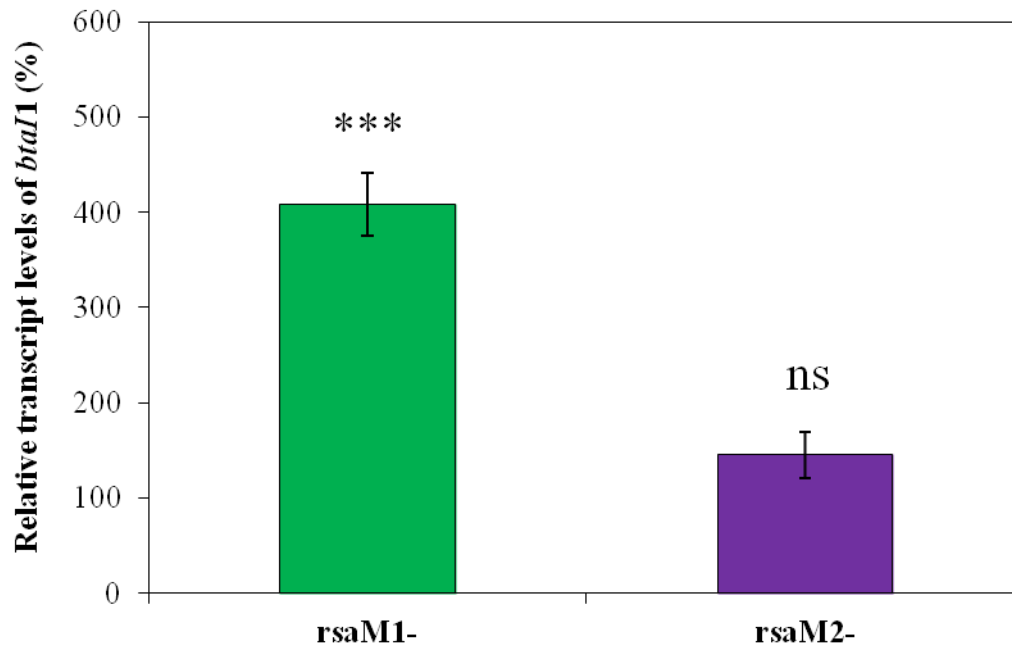

**Figure S5. The impact of RsaM1 and RsaM2 on *btaI1* transcription.** The relative transcript levels of *btaI1* were assessed by qRT-PCR in cultures of the wild-type and the *rsaM1*- and *rsaM2*- mutant strains of *B. thailandensis* E264. The results are presented as relative quantification of transcription of the gene compared to the wild-type strain, which was set at 100%. The values represent the means for three replicates. \*\*\*,  $P < 0.001$ ; ns, nonsignificant.

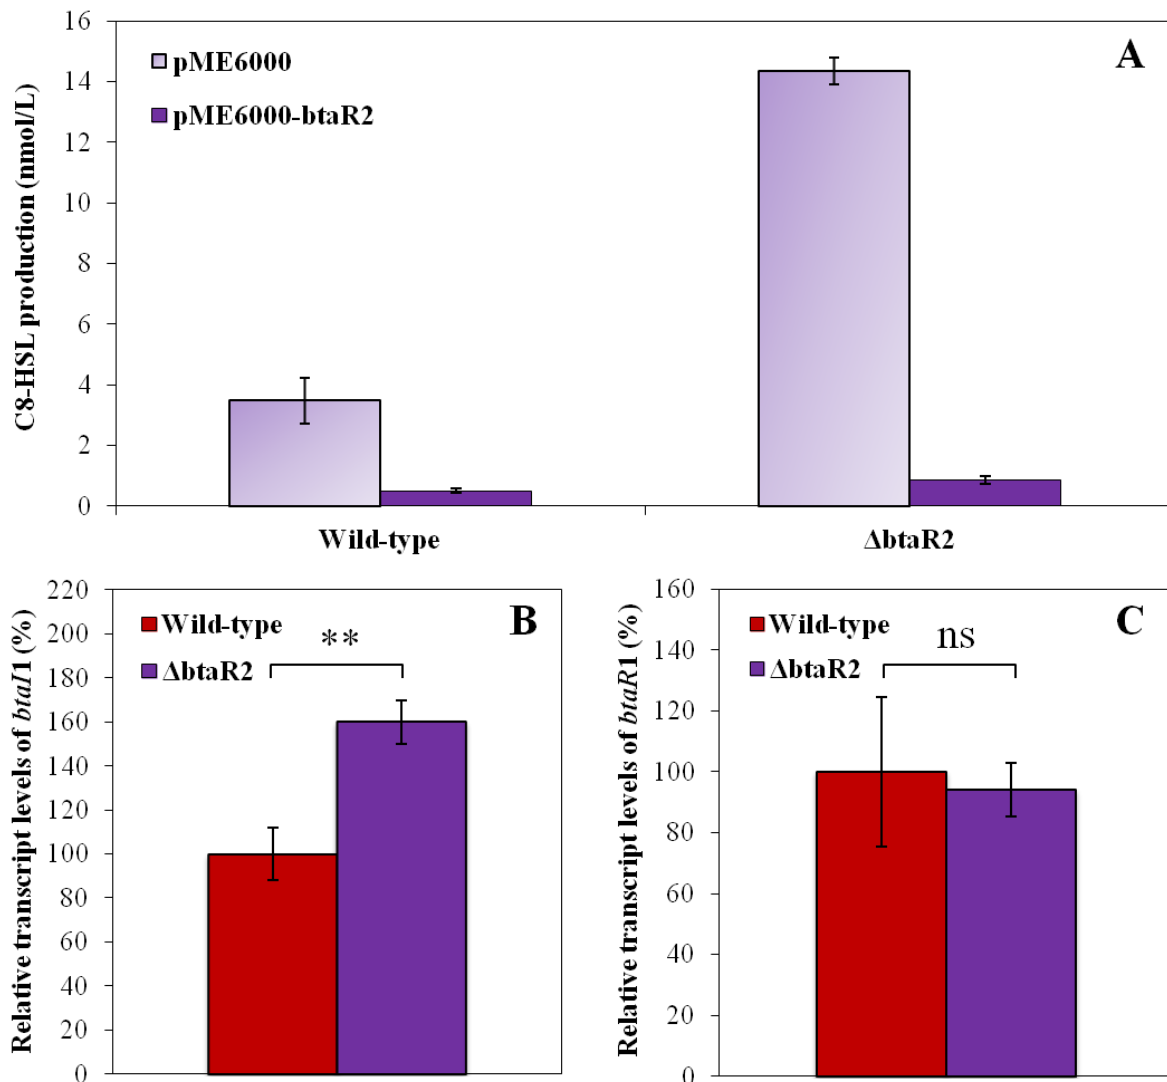

**Figure S6. The biosynthesis of C<sub>8</sub>-HSL and *btaI1* transcription are negatively regulated by BtaR2.** (A) C<sub>8</sub>-HSL production was quantified using LC-MS/MS during the logarithmic growth in cultures of the wild-type strain and the  $\Delta btaR2$  mutant strain of *B. thailandensis* E264 carrying either pME6000 (light purple bars) or pME6000-*btaR2* (dark purple bars). The values represent the means for three replicates. The relative transcript levels of (B) *btaI1* and (C) *btaR1* from the wild-type *B. thailandensis* E264 strain and its  $\Delta btaR2$  mutant strain were estimated by qRT-PCR during the logarithmic growth. The results are presented as relative quantification of transcription of the gene compared to the wild-type strain, which was set at 100%. \*\*,  $P < 0.01$ ; ns, nonsignificant.

**Table S1. Bacterial strains used in this study.**

| Strains                 | Description                                                                                                                                | Reference      |
|-------------------------|--------------------------------------------------------------------------------------------------------------------------------------------|----------------|
| <i>E. coli</i>          |                                                                                                                                            |                |
| <b>χ7213</b>            | <i>thr-1, leuB6, fhuA21, lacY1, glnV44, recA1, ΔasdA4, Δ(zhf-2::Tn10), thi-1, RP4-2-Tc :: Mu [λ pir]</i>                                   | Lab collection |
| <b>DH5α</b>             | F-, φ80dlacZΔM15, Δ( <i>lacZYA-argF</i> )U169, <i>deoR, recA1, endA1, hsdR17</i> (rk-, mk+), <i>phoA, supE44, λ-, thi-1, gyrA96, relA1</i> | Lab collection |
| <i>B. thailandensis</i> |                                                                                                                                            |                |
| <b>E264</b>             | Wild-type                                                                                                                                  | (3)            |
| <b>JBT107</b>           | E264 <i>ΔbtaR1</i>                                                                                                                         | (2)            |
| <b>JBT108</b>           | E264 <i>ΔbtaR2</i>                                                                                                                         | (2)            |
| <b>JBT109</b>           | E264 <i>ΔbtaR3</i>                                                                                                                         | (2)            |
| <b>JBT112</b>           | E264 <i>ΔbtaI1 ΔbtaI2 ΔbtaI3</i>                                                                                                           | (2)            |
| <b>JBT101</b>           | E264 <i>ΔbtaI1</i>                                                                                                                         | (2)            |
| <b>JBT102</b>           | E264 <i>ΔbtaI2</i>                                                                                                                         | (2)            |
| <b>JBT103</b>           | E264 <i>ΔbtaI3</i>                                                                                                                         | (2)            |
| <b>BT03295</b>          | E264 <i>rsaM1::ISlacZ-PrhaBo-Tp/FRT; Tp<sup>R</sup></i>                                                                                    | (4)            |
| <b>BT04218</b>          | E264 <i>rsaM2::ISlacZ-PrhaBo-Tp/FRT; Tp<sup>R</sup></i>                                                                                    | (4)            |
| <b>ED1020</b>           | E264 (pME6000)                                                                                                                             | This study     |
| <b>ED3477</b>           | E264 (pME6000- <i>btaR2</i> )                                                                                                              | This study     |
| <b>ED3478</b>           | E264 <i>ΔbtaR2</i> (pME6000)                                                                                                               | This study     |
| <b>ED1015</b>           | E264 <i>ΔbtaR2</i> (pME6000- <i>btaR2</i> )                                                                                                | This study     |
| <b>ED3330</b>           | E264:: <i>btaI1-lux</i>                                                                                                                    | (1)            |

|               |                                       |            |
|---------------|---------------------------------------|------------|
| <b>ED3331</b> | E264:: <i>btaI2-lux</i>               | (1)        |
| <b>ED3332</b> | E264:: <i>btaI3-lux</i>               | (1)        |
| <b>ED3469</b> | E264 <i>rsaM1</i> :: <i>btaI1-lux</i> | This study |
| <b>ED3470</b> | E264 <i>rsaM1</i> :: <i>btaI2-lux</i> | This study |
| <b>ED3471</b> | E264 <i>rsaM1</i> :: <i>btaI3-lux</i> | This study |
| <b>ED3472</b> | E264 <i>rsaM2</i> :: <i>btaI1-lux</i> | This study |
| <b>ED3473</b> | E264 <i>rsaM2</i> :: <i>btaI2-lux</i> | This study |
| <b>ED3474</b> | E264 <i>rsaM2</i> :: <i>btaI3-lux</i> | This study |

---



**Table S2. Plasmids used in this study.**

| <b>Plasmids</b> | <b>Description</b>                                                                                                                                                                     | <b>Source</b> |
|-----------------|----------------------------------------------------------------------------------------------------------------------------------------------------------------------------------------|---------------|
| <b>pME6000</b>  | Broad-host-range cloning vector; Tc <sup>R</sup>                                                                                                                                       | (5)           |
| <b>pMCG21</b>   | <i>btaR2</i> inserted in <i>Bam</i> HI- <i>Hind</i> III restriction sites in pME6000; Tc <sup>R</sup>                                                                                  | This study    |
| <b>pSLG02</b>   | <i>btaI1</i> promoter inserted in the restriction sites <i>Xho</i> I- <i>Bam</i> HI in the mini-CTX- <i>lux</i> integration vector with promoterless <i>luxCDABE</i> ; Tc <sup>R</sup> | (1)           |
| <b>pSLG03</b>   | <i>btaI2</i> promoter inserted in the restriction sites <i>Xho</i> I- <i>Bam</i> HI in the mini-CTX- <i>lux</i> integration vector with promoterless <i>luxCDABE</i> ; Tc <sup>R</sup> | (1)           |
| <b>pSLG04</b>   | <i>btaI3</i> promoter inserted in the restriction sites <i>Xho</i> I- <i>Bam</i> HI in the mini-CTX- <i>lux</i> integration vector with promoterless <i>luxCDABE</i> ; Tc <sup>R</sup> | (1)           |

**Table S3. Primers used for PCR.**

| <b>Genes</b>        | <b>Oligonucleotides</b> | <b>Sequences (5' to 3')</b>   |
|---------------------|-------------------------|-------------------------------|
| <b><i>btaR2</i></b> | btaR2F                  | GCGGGATCCATGCGAGGATATGGAGATGC |
|                     | btaR2R                  | CGCAAGCTTTCGAGATATCCCGCCTATTG |

**Table S4. Primers used for RT-PCR and qRT-PCR.**

| <b>Genes</b>              | <b>Oligonucleotides</b>  | <b>Sequences (5' to 3')</b> |
|---------------------------|--------------------------|-----------------------------|
| <b><i>ndh</i></b>         | SLG_qRT-PCR_ndh_F        | ACCAGGGCGAATTGATCTC         |
|                           | SLG_qRT-PCR_ndh_R        | GATGACGAGCGTGTCTGATT        |
| <b><i>btaR1</i></b>       | SLG_qRT-PCR_btaR1_F      | AGCTCGAACATGATCGTCTG        |
|                           | SLG_qRT-PCR_btaR1_R      | TGAAGCGTCAGATGGTTGAT        |
| <b><i>btaR2</i></b>       | SLG_qRT-PCR_btaR2_F      | GAGAAATCCGCAACGAGAG         |
|                           | SLG_qRT-PCR_btaR2_R      | GCCGTCCACTTCAACACAT         |
| <b><i>btaR3</i></b>       | SLG_qRT-PCR_btaR3_F      | CGACTACTTCACCATCGATCC       |
|                           | SLG_qRT-PCR_btaR3_R      | GCTGATGCCGTTGTCTGAG         |
| <b><i>btaI1</i></b>       | btaI1RTF                 | CTTCGAACGGGATCAATACG        |
|                           | btaI1RTR                 | CATGTCGTGTGCGACCAG          |
| <b><i>rsaM1</i></b>       | SLG_qPCR_BTH_II1511_F    | TGAATTCACCACTGCTCCAC        |
|                           | SLG_qPCR_BTH_II1511_R    | ATTCCGGACGATACGTGAAC        |
| <b><i>rsaM2</i></b>       | SLG_qPCR_BTH_II1228_F    | GGACGGATACGTTCTGTCTGT       |
|                           | SLG_qPCR_BTH_II1228_R    | AGGTCCCAGATTTCCGAGAG        |
| <b><i>rsaM1-btaI1</i></b> | SLG_RT-PCR_rsaM1-btaI1_F | GTCGCTACCGCGATGCTT          |
|                           | SLG_RT-PCR_rsaM1-btaI1_R | CCGATAAAGGCCAGATCA          |
| <b><i>rsaM2-btaI2</i></b> | SLG_RT-PCR_rsaM2-btaI2_F | GGCGATTTCTATTGGATTGG        |
|                           | SLG_RT-PCR_rsaM2-btaI2_R | CTTGACGGTGGAATCCAGTT        |

## References

1. Le Guillouzer S, Groleau MC, Déziel E. 2017. The complex quorum sensing circuitry of *Burkholderia thailandensis* is both hierarchically and homeostatically organized. *mBio* 8:e01861-17.
2. Chandler JR, Duerkop BA, Hinz A, West TE, Herman JP, Churchill ME, Skerrett SJ, Greenberg EP. 2009. Mutational analysis of *Burkholderia thailandensis* quorum sensing and self-aggregation. *J Bacteriol* 191:5901-9.
3. Brett PJ, DeShazer D, Woods DE. 1998. *Burkholderia thailandensis* sp. nov., a *Burkholderia pseudomallei*-like species. *Int J Syst Bacteriol* 48 Pt 1:317-20.
4. Gallagher LA, Ramage E, Patrapuvich R, Weiss E, Brittnacher M, Manoil C. 2013. Sequence-defined transposon mutant library of *Burkholderia thailandensis*. *MBio* 4:e00604-13.
5. Maurhofer M, Reimann C, Schmidli-Sacherer P, Heeb S, Haas D, Defago G. 1998. Salicylic Acid Biosynthetic Genes Expressed in *Pseudomonas fluorescens* Strain P3 Improve the Induction of Systemic Resistance in Tobacco Against Tobacco Necrosis Virus. *Phytopathology* 88:678-84.
